# Supplementary material for: Association of working conditions including digital technology use and systemic inflammation among employees: study protocol for a systematic review
Source: PubMed Central journal article supplement (PMC7523305; doi:10.1186/s13643-020-01463-x), 2020-09-28
Supplement: 13643_2020_1463_MOESM2_ESM.pdf [file 13643_2020_1463_MOESM2_ESM.pdf]

Table A1

*Team members of the planned systematic review and meta-analysis, their roles, applicable knowledge and skills as well as respective responsibilities*

| <b>Team member</b> | <b>Applicable knowledge and skills</b>                                                                                                                               | <b>Responsibilities</b>                                                                                                                                                                              |
|--------------------|----------------------------------------------------------------------------------------------------------------------------------------------------------------------|------------------------------------------------------------------------------------------------------------------------------------------------------------------------------------------------------|
| Helena Kaltenegger | Psychological risk factors for mental and physical health, health and well-being in the workplace                                                                    | Development of search strategy, study selection, data extraction, data processing and classification of variables, risk of bias assessment, data synthesis, content drafting and approval            |
| Linda Becker       | Stress physiology, psychological risk factors for mental and physical health, systematic reviews and meta-analysis                                                   | Stress physiology consultation, systematic review methods consultation, evidence evaluation, content review and approval                                                                             |
| Nicolas Rohleder   | Stress physiology, immune function and inflammation, stress system regulation of inflammatory processes, psychoneuroimmunology, systematic reviews and meta-analysis | Psychoneuroimmunology consultation, systematic review methods consultation, evidence evaluation, content review and approval                                                                         |
| Dennis Nowak       | Occupational and internal medicine, workplace risk factors for health, industrial safety, systematic reviews and meta-analysis                                       | Medical physiology and systemic inflammation consultation, evidence evaluation, content review and approval                                                                                          |
| Matthias Weigl     | Psychosocial risks at work, Well-being outcomes at work, occupational stress, Work analysis, systematic reviews, occupational epidemiology                           | Systematic review methods consultation, study selection, data extraction, data processing and classification of variables, risk of bias assessment, evidence evaluation, content review and approval |
